# Supplementary material for: On the energy budget of a low-Arctic snowpack
Source: Copernicus journal article supplement (doi:10.5194/tc-2021-255), 2021-08-25
Supplement: Supplementary file 1 [file tc-2021-255-supplement.pdf]

# On the energy budget of a low-Arctic snowpack

Georg Lackner, Daniel F. Nadeau, Florent Domine,  
Annie-Claude Parent, François Anctil

## Supplementary material

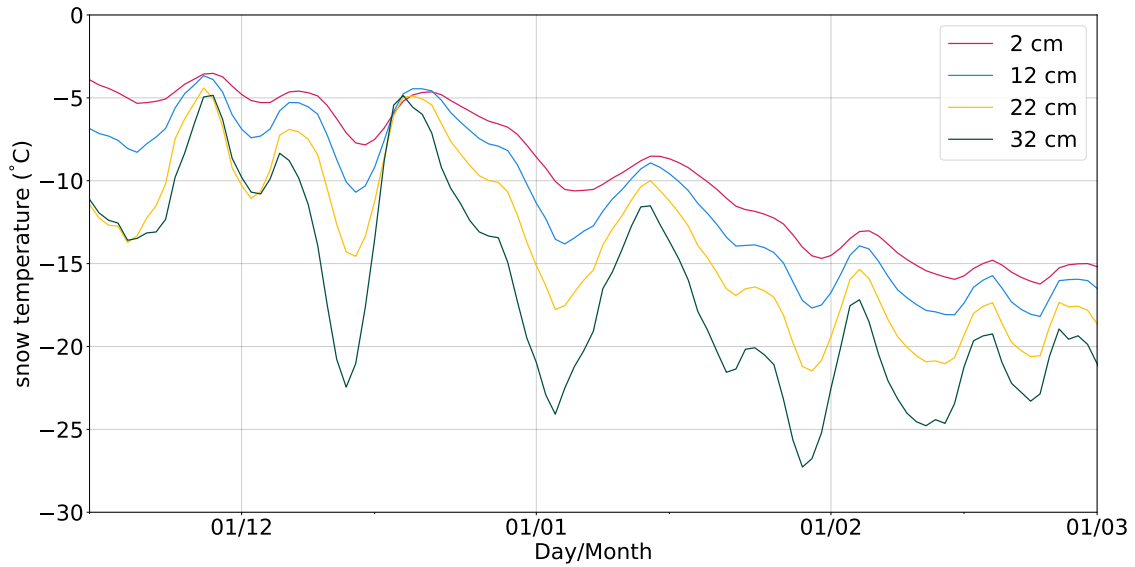

Supplementary Figure 1: Snow temperature at 4 heights above the ground. Note that the temperature at 32 cm is in fact the air temperature until mid-December, for certain periods as the corresponding thermocouple was not always covered with snow until that date.

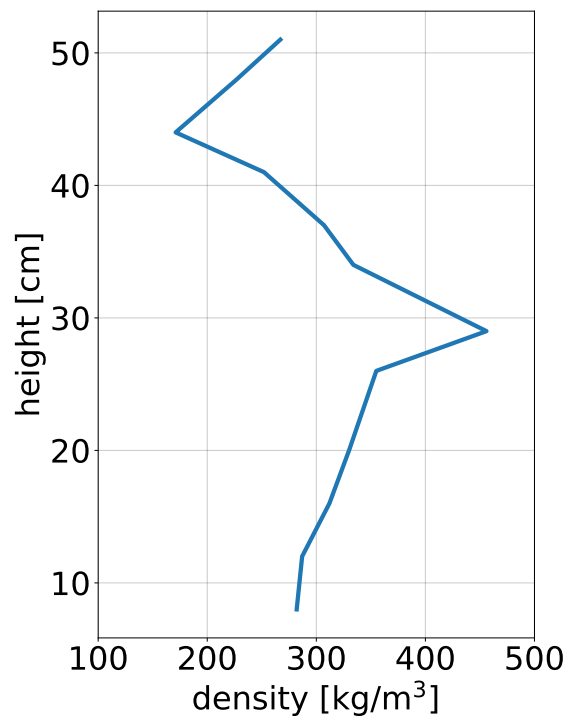

Supplementary Figure 2: Density profile taken on March 22 in 2019.

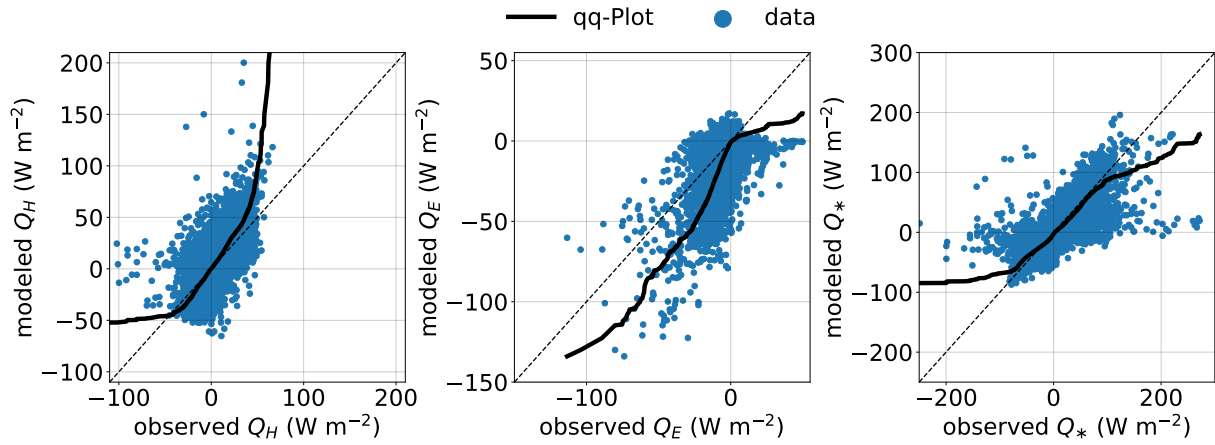

Supplementary Figure 3: Comparison between hourly means of modeled and simulated  $Q_H, Q_E$ , and  $Q_*$  for all three study winters. Overlain is a quantile-quantile plot.

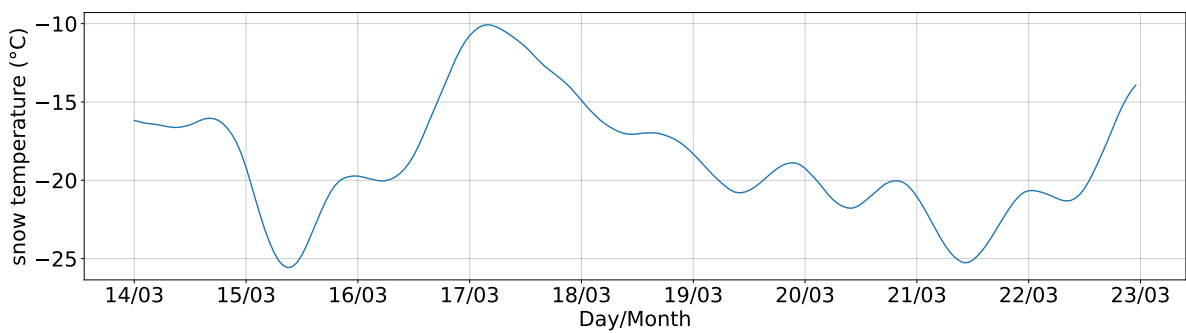

Supplementary Figure 4: Snow temperature 49.5 cm above ground for a period between March 14 and March 23.
